# Supplementary material
Source: ML conference proceedings conference paper supplement (https://openaccess.thecvf.com/content/WACV2021/html/Fan_MART_Motion-Aware_Recurrent_WACV_2021_paper.html)
Supplement: Supplementary file 1 [file Fan_MART_Motion-Aware_Recurrent_WACV_2021_supplemental.pdf]

# MART: Motion-Aware Recurrent Neural Network for Robust Visual Tracking

## — Supplementary Material —

### 1. Detailed architecture of BBR-IoU network

We introduce a monotonic bounding box regression for scale estimation in which the core is the BBR-IoU network. Fig. 1 illustrates the detailed architecture of BBR-IoU network, which predicts the regression offsets of a candidate box and then estimates the confidence of regression. We utilize the modulation strategy in [4] for design. However, our BBR-IoU network is different in two aspects: (1) we perform bounding box regression and IoU prediction and (2) we adopt more efficient RoIAlign [9] for RoI feature pooling because we do not need backward pass to compute gradients for scale estimation. For backbone network, we use ResNet-50 [10].

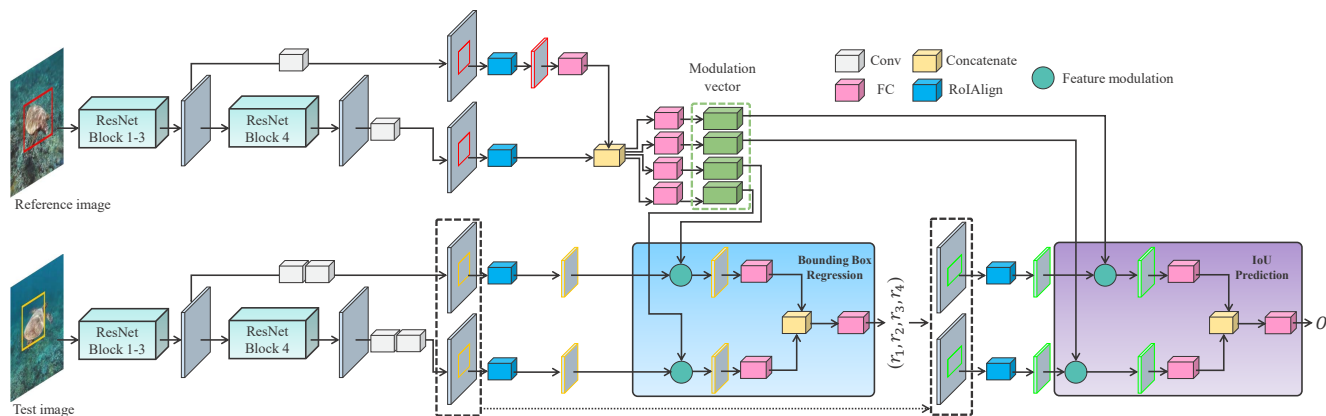

Figure 1. Illustration of detailed architecture of BBR-IoU network. BBR-IoU network predicts the regression offsets  $(r_1, r_2, r_3, r_4)$  and IoU prediction score  $O$  for the regression result. Best viewed in color.

### References

- [1] Luca Bertinetto, Jack Valmadre, Joao F Henriques, Andrea Vedaldi, and Philip HS Torr. Fully-convolutional siamese networks for object tracking. In *ECCVW*, 2016.
- [2] Goutam Bhat, Martin Danelljan, Luc Van Gool, and Radu Timofte. Learning discriminative model prediction for tracking. In *ICCV*, 2019.
- [3] Jongwon Choi, Hyung Jin Chang, Tobias Fischer, Sangdoon Yun, Kyuewang Lee, Jiyeoup Jeong, Yiannis Demiris, and Jin Young Choi. Context-aware deep feature compression for high-speed visual tracking. In *CVPR*, 2018.
- [4] Martin Danelljan, Goutam Bhat, Fahad Shahbaz Khan, and Michael Felsberg. Atom: Accurate tracking by overlap maximization. In *CVPR*, 2019. 1
- [5] Martin Danelljan, Goutam Bhat, Fahad Shahbaz Khan, and Michael Felsberg. Eco: Efficient convolution operators for tracking. In *CVPR*, 2017.
- [6] Heng Fan, Liting Lin, Fan Yang, Peng Chu, Ge Deng, Sijia Yu, Hexin Bai, Yong Xu, Chunyuan Liao, and Haibin Ling. Lasot: A high-quality benchmark for large-scale single object tracking. In *CVPR*, 2019.
- [7] Heng Fan and Haibin Ling. Siamese cascaded region proposal networks for real-time visual tracking. In *CVPR*, 2019.
- [8] Qing Guo, Wei Feng, Ce Zhou, Rui Huang, Liang Wan, and Song Wang. Learning dynamic siamese network for visual object tracking. In *ICCV*, 2017.

- [9] Kaiming He, Georgia Gkioxari, Piotr Dollár, and Ross Girshick. Mask r-cnn. In *ICCV*, 2017. 1
- [10] Kaiming He, Xiangyu Zhang, Shaoqing Ren, and Jian Sun. Deep residual learning for image recognition. In *CVPR*, 2016. 1
- [11] Bo Li, Wei Wu, Qiang Wang, Fangyi Zhang, Junliang Xing, and Junjie Yan. Siamrpn++: Evolution of siamese visual tracking with very deep networks. In *CVPR*, 2019.
- [12] Feng Li, Cheng Tian, Wangmeng Zuo, Lei Zhang, and Ming-Hsuan Yang. Learning spatial-temporal regularized correlation filters for visual tracking. In *CVPR*, 2018.
- [13] Pengpeng Liang, Erik Blasch, and Haibin Ling. Encoding color information for visual tracking: Algorithms and benchmark. *TIP*, 24(12):5630–5644, 2015.
- [14] Hyeonseob Nam and Bohyung Han. Learning multi-domain convolutional neural networks for visual tracking. In *CVPR*, 2016.
- [15] Yi Wu, Jongwoo Lim, and Ming-Hsuan Yang. Object tracking benchmark. *TPAMI*, 37(9):1834–1848, 2015.
- [16] Yunhua Zhang, Lijun Wang, Jinqing Qi, Dong Wang, Mengyang Feng, and Huchuan Lu. Structured siamese network for real-time visual tracking. In *ECCV*, 2018.
- [17] Zhipeng Zhang and Houwen Peng. Deeper and wider siamese networks for real-time visual tracking. In *CVPR*, 2019.
